# Supplementary material
Source: PubMed Central journal article supplement (PMC7216788)
Supplement: NIHMS1558515-supplement-Sup__Figure_1.pdf [file NIHMS1558515-supplement-Sup__Figure_1.pdf]

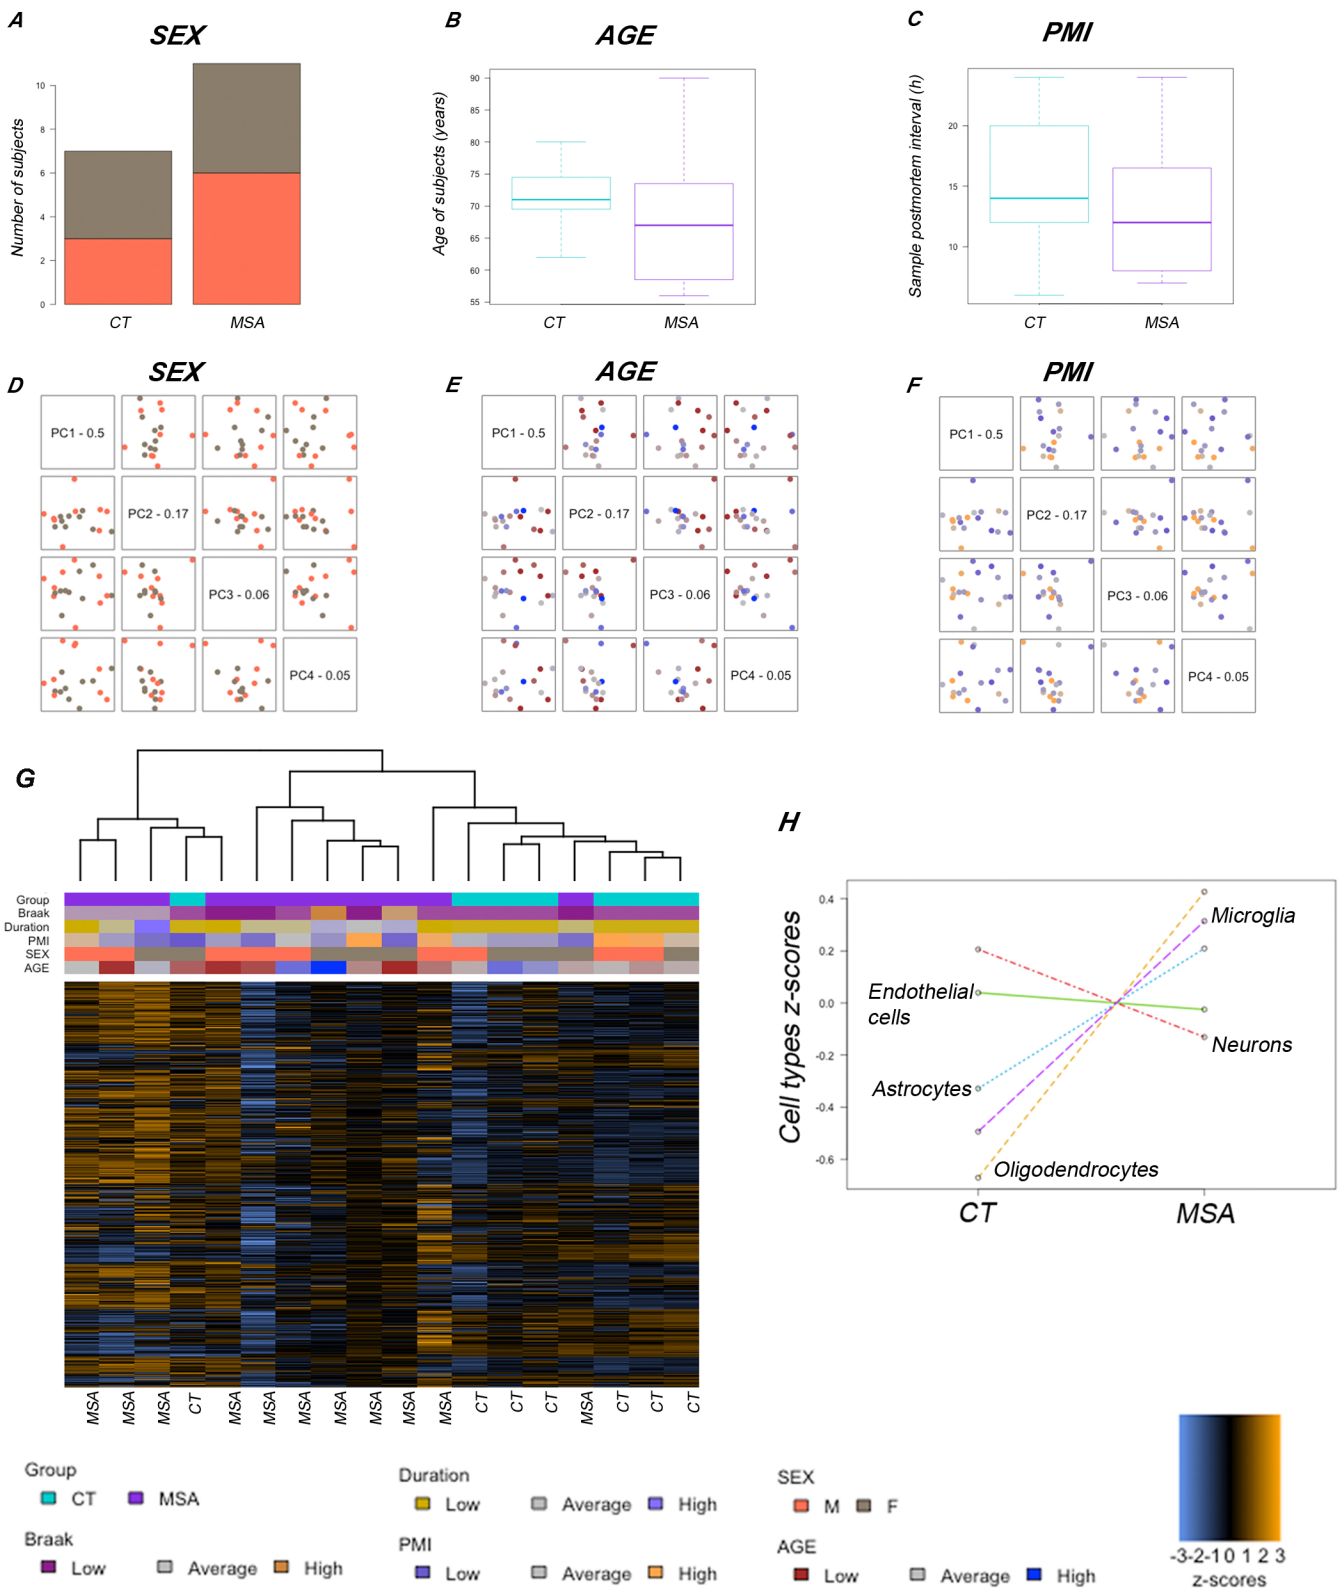

**Supplementary Figure 1. Variable analysis and data QC.** Analysis of sex (A), age (B) and PMI (C) distribution per group showing no significant differences. D-E. Analysis of the four principal components of the gene expression data plotted against sex (D), age (E) and PMI (F) as potential variables showing no association with prominent signal in the data. G. Unsupervised clustering heatmap of normalized data scaled to give all genes equal variance. Top rows show all samples passed QC and that group (MSA/CT) was the main clustering factor in the data. H. Covariate plots of relative cell measurements based on cell-type specific markers in control and MSA samples.
