# Supplementary material
Source: PubMed Central journal article supplement (PMC7216788)
Supplement: NIHMS1558515-supplement-Sup__Figure_2.pdf [file NIHMS1558515-supplement-Sup__Figure_2.pdf]

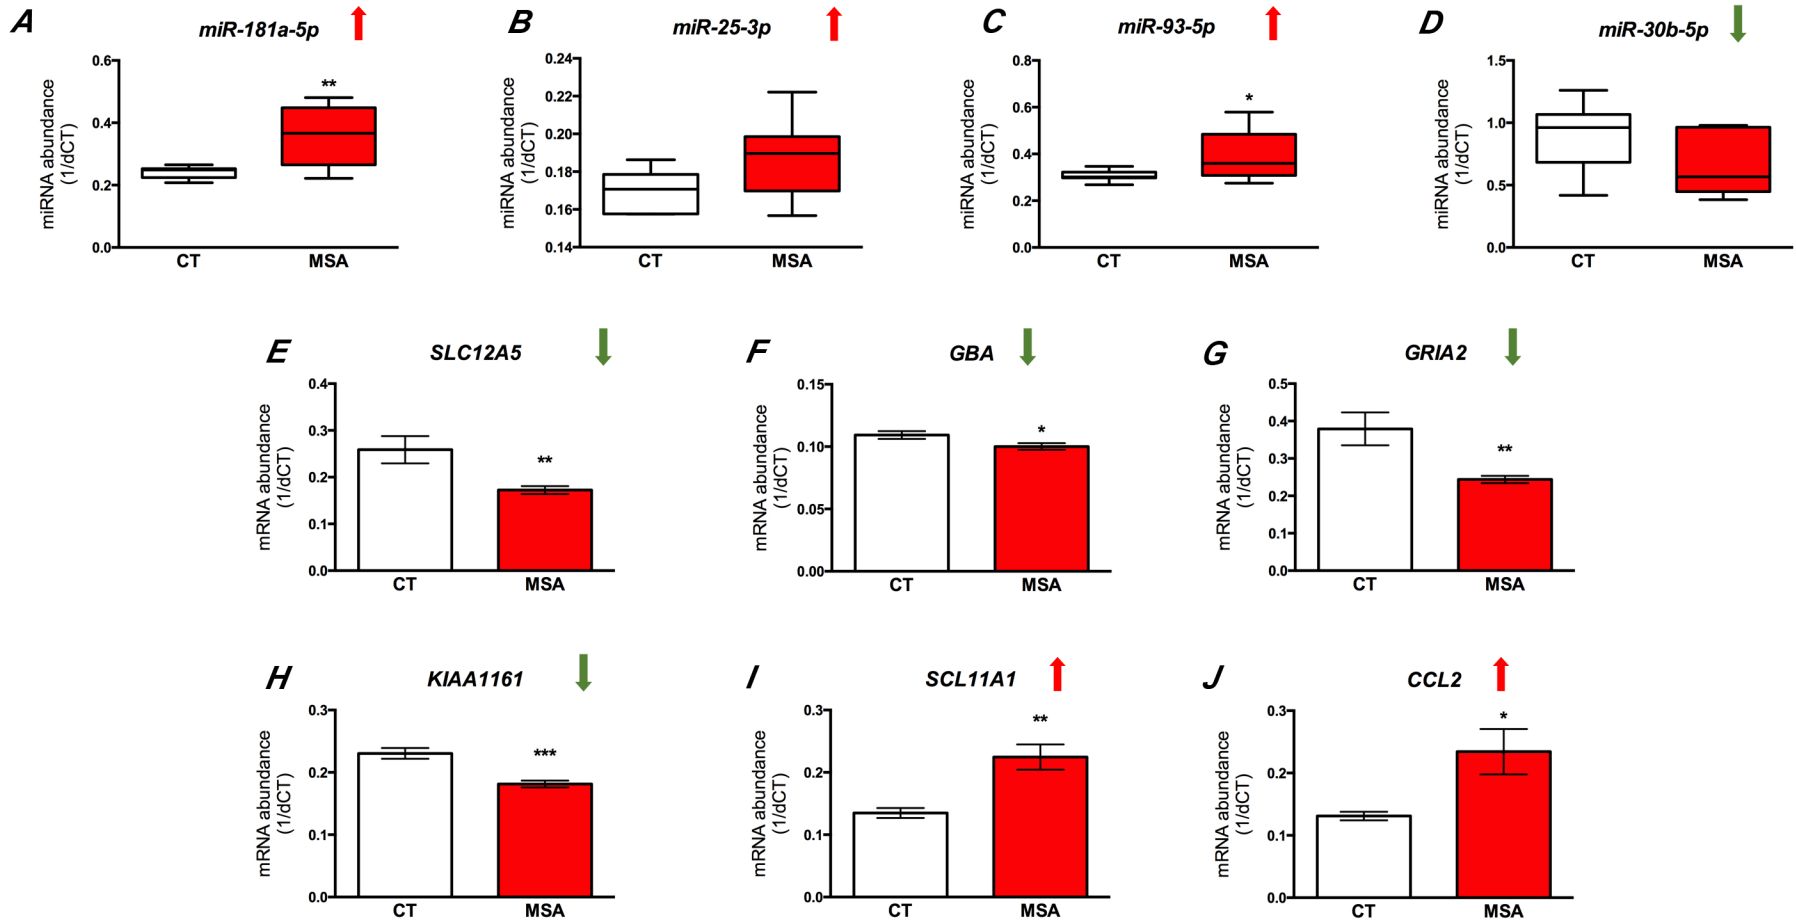

**Supplementary Figure 2. Validation of array findings by qPCR.** Quantitative real-time PCR was used to verify Nanostring arrays findings for selected miRNAs (A-D) and mRNAs (E-J) that showed differential expression in MSA brains according to array analysis. Aliquots from the same RNA samples used in array hybridization were reverse transcribed and used as cDNA template for qPCR reactions using specific Taqman probes. Red arrows indicate increased and green arrows indicate decreased expression as per array results. \*  $p < 0.05$ ; \*\*  $p < 0.01$  as per unpaired t-test.
