# Supplementary material
Source: PubMed Central journal article supplement (PMC7216788)
Supplement: NIHMS1558515-supplement-Sup__Table_1.pdf [file NIHMS1558515-supplement-Sup__Table_1.pdf]

**Supplementary Table 1. Demographic, clinical and pathological characteristics of the study cohort.**

|                | <b>N</b> | <b>PMI<sup>1</sup><br/>(h)</b> | <b>Sex<br/>(M/F)</b> | <b>Age<br/>(y)</b> | <b>Duration<sup>2</sup><br/>(y)</b> | <b>Braak<br/>Stage<sup>3</sup></b> |
|----------------|----------|--------------------------------|----------------------|--------------------|-------------------------------------|------------------------------------|
| <b>Control</b> | 7        | 15.4 ± 6.4                     | 3/4                  | 71.6 ± 5.8         | n/a                                 | 0                                  |
| <b>MSA</b>     | 11       | 13.1 ± 5.9                     | 5/6                  | 68.1 ± 10.7        | 7.4 ± 3.6                           | 0 - IV                             |

1. postmortem interval; 2. disease duration from first clinical diagnosis until death; 3.

Braak staging for Parkinson's pathology<sup>31</sup>.
