# Supplementary material
Source: PubMed Central journal article supplement (PMC7216788)
Supplement: NIHMS1558515-supplement-Sup__Table_2.pdf [file NIHMS1558515-supplement-Sup__Table_2.pdf]

**Supplementary Table 2. miRNAs differentially expressed in MSA striatum**

| <b>Probe Name</b> | <b>Accession #</b> | <b>Fold change</b> | <b>P value</b> | <b>FDR</b> | <b>seed + m8</b> |
|-------------------|--------------------|--------------------|----------------|------------|------------------|
| hsa-miR-24-3p     | MIMAT0000080       | 1.53               | 0.00000513     | 0.03       | GGCUCAG          |
| hsa-miR-25-3p     | MIMAT0000081       | 1.7                | 0.00004123     | 0.04       | AUUGCAC          |
| hsa-miR-100-5p    | MIMAT0000098       | 1.98               | 0.00002345     | 0.04       | ACCGUA           |
| hsa-miR-181a-3p   | MIMAT0000270       | 2                  | 0.00004035     | 0.04       | CCAUCGA          |
| hsa-miR-181a-5p   | MIMAT0000256       | 2.15               | 0.00004082     | 0.04       | ACAUUCA          |
| hsa-miR-219a-2-3p | MIMAT0004675       | 3.29               | 0.00003746     | 0.04       | GAAUUGU          |
| hsa-miR-30b-5p    | MIMAT0000420       | -1.66              | 0.00008081     | 0.05       | GUAAACA          |
| hsa-miR-151a-3p   | MIMAT0000757       | 1.69               | 0.00006743     | 0.05       | UAGACUG          |
| hsa-miR-296-5p    | MIMAT0000690       | 1.69               | 0.00005952     | 0.05       | GGGCCCC          |
| hsa-miR-185-5p    | MIMAT0000455       | 1.74               | 0.00007177     | 0.05       | GGAGAGA          |
| hsa-miR-93-5p     | MIMAT0000093       | 1.49               | 0.00013672     | 0.07       | AAAGUGC          |
| hsa-miR-625-5p    | MIMAT0003294       | 1.96               | 0.00012262     | 0.07       | GGGGGAA          |
| hsa-miR-539-5p    | MIMAT0003163       | -1.65              | 0.00018507     | 0.08       | GAGAAAU          |
| hsa-miR-421       | MIMAT0003339       | 1.56               | 0.00017067     | 0.08       | UCAACAG          |
| hsa-miR-181c-5p   | MIMAT0000258       | 1.65               | 0.00021617     | 0.08       | ACAUUCA          |
| hsa-miR-181b-5p   | MIMAT0000257       | 2.03               | 0.00022918     | 0.08       | ACAUUCA          |
| hsa-miR-664b-3p   | MIMAT0022272       | 1.56               | 0.00032707     | 0.11       | UCAUUUG          |
| hsa-miR-376c-3p   | MIMAT0000720       | -1.47              | 0.00042255     | 0.14       | ACAUAGA          |
| hsa-miR-155-5p    | MIMAT0000646       | 1.48               | 0.00045855     | 0.14       | UAAUGCU          |
| hsa-miR-218-5p    | MIMAT0000275       | -2.2               | 0.00050303     | 0.15       | UGUGCUU          |
| hsa-miR-137       | MIMAT0000429       | -2.06              | 0.00061167     | 0.15       | UAUUGCU          |
| hsa-miR-186-5p    | MIMAT0000456       | 1.36               | 0.00061445     | 0.15       | AAAGAAU          |
| hsa-miR-92a-3p    | MIMAT0000092       | 1.57               | 0.00051601     | 0.15       | AUUGCAC          |
| hsa-let-7b-5p     | MIMAT0000063       | 1.66               | 0.00061389     | 0.15       | GAGGUAG          |
| hsa-miR-28-5p     | MIMAT0000085       | 1.52               | 0.00066894     | 0.16       | AGGAGCU          |
| hsa-miR-592       | MIMAT0003260       | -1.86              | 0.00083762     | 0.17       | UGUGUCA          |
| hsa-miR-124-3p    | MIMAT0000422       | -1.78              | 0.00076596     | 0.17       | AAGGCAC          |
| hsa-miR-454-3p    | MIMAT0003885       | 1.43               | 0.00079442     | 0.17       | AGUGCAA          |
| hsa-miR-574-3p    | MIMAT0003239       | 2.06               | 0.00083185     | 0.17       | ACGCUCA          |
| hsa-miR-656-3p    | MIMAT0003332       | -1.97              | 0.00110707     | 0.19       | AUAUUAU          |
| hsa-miR-551b-3p   | MIMAT0003233       | -1.93              | 0.00099793     | 0.19       | CGACCCA          |
| hsa-miR-575       | MIMAT0003240       | 1.45               | 0.00107833     | 0.19       | AGCCAGU          |
| hsa-miR-590-5p    | MIMAT0003258       | 1.55               | 0.00095376     | 0.19       | AGCUUUAU         |
| hsa-miR-23b-3p    | MIMAT0000418       | 1.56               | 0.00103623     | 0.19       | UCACAUU          |
| hsa-miR-28-3p     | MIMAT0004502       | 1.43               | 0.00139775     | 0.23       | ACUAGAU          |
| hsa-miR-148a-3p   | MIMAT0000243       | -2.39              | 0.00196162     | 0.31       | CAGUGCA          |
| hsa-miR-154-5p    | MIMAT0000452       | -1.47              | 0.0024279      | 0.38       | AGGUUUAU         |
| hsa-miR-1290      | MIMAT0005880       | 1.53               | 0.00282087     | 0.43       | GGAUUUU          |
| hsa-miR-423-5p    | MIMAT0004748       | 1.51               | 0.00310837     | 0.46       | GAGGGGC          |
| hsa-miR-495-3p    | MIMAT0002817       | -1.59              | 0.00334542     | 0.48       | AACAAAC          |
| hsa-miR-140-3p    | MIMAT0004597       | 1.37               | 0.00350199     | 0.49       | CCACAGG          |
| hsa-miR-598-3p    | MIMAT0003266       | -1.97              | 0.00370701     | 0.5        | ACGUCAU          |
| hsa-miR-151a-5p   | MIMAT0004697       | 1.44               | 0.0036409      | 0.5        | CGAGGAG          |

|                  |              |       |            |      |         |
|------------------|--------------|-------|------------|------|---------|
| hsa-miR-106a-5p  | MIMAT0000103 | 1.49  | 0.00410738 | 0.52 | AAAGUGC |
| hsa-miR-330-3p   | MIMAT0000751 | 1.8   | 0.00416022 | 0.52 | CAAAGCA |
| hsa-miR-577      | MIMAT0003242 | 2.07  | 0.0039806  | 0.52 | AGAUAAA |
| hsa-miR-423-3p   | MIMAT0001340 | 1.44  | 0.00446397 | 0.55 | GCUCGGU |
| hsa-miR-29c-3p   | MIMAT0000681 | -1.52 | 0.00480312 | 0.56 | AGCACCA |
| hsa-miR-411-5p   | MIMAT0003329 | -1.42 | 0.00470038 | 0.56 | AGUAGAC |
| hsa-miR-548n     | MIMAT0005916 | 1.62  | 0.00469486 | 0.56 | AAAAGUA |
| hsa-miR-574-5p   | MIMAT0004795 | 1.3   | 0.00566791 | 0.63 | GAGUGUG |
| hsa-miR-1297     | MIMAT0005886 | 1.52  | 0.00551069 | 0.63 | UCAAGUA |
| hsa-miR-15a-5p   | MIMAT0000068 | 1.43  | 0.00584162 | 0.64 | AGCAGCA |
| hsa-miR-642a-5p  | MIMAT0003312 | 1.68  | 0.00615486 | 0.66 | UCCUCU  |
| hsa-miR-193a-5p+ | MIMAT0004614 | 1.6   | 0.00634421 | 0.67 | GGGUCUU |
| hsa-miR-10a-5p   | MIMAT0000253 | 1.26  | 0.00745056 | 0.77 | ACCCUGU |
| hsa-miR-192-5p   | MIMAT0000222 | 1.24  | 0.0082612  | 0.84 | UGACCUA |
| hsa-miR-1185-5p  | MIMAT0005798 | -1.36 | 0.00927466 | 0.93 | GAGGAUA |
| hsa-let-7i-5p    | MIMAT0000415 | 1.32  | 0.00949164 | 0.94 | GAGGUAG |
