# Supplementary material
Source: PubMed Central journal article supplement (PMC7216788)
Supplement: NIHMS1558515-supplement-Sup__Table_3.pdf [file NIHMS1558515-supplement-Sup__Table_3.pdf]

**Supplementary Table 3. Genes differentially expressed in MSA striatum**

| <b>Gene</b> | <b>Accession #</b> | <b>Log2 fold change</b> | <b>P-value</b> | <b>BY.p.value</b> |
|-------------|--------------------|-------------------------|----------------|-------------------|
| KIAA1161    | NM_020702.3        | -0.984                  | 2.44E-05       | 0.0853            |
| EFNA1       | NM_004428.2        | 1.9                     | 5.45E-05       | 0.0853            |
| SLC11A1     | NM_000578.2        | 3.68                    | 5.66E-05       | 0.0853            |
| CCL2        | NM_002982.3        | 3.99                    | 7.51E-05       | 0.0853            |
| TGFB1       | NM_000660.4        | 1.27                    | 0.000146       | 0.112             |
| PSMB9       | NM_002800.4        | 1.16                    | 0.000148       | 0.112             |
| STAT3       | NM_003150.3        | 1.13                    | 0.000223       | 0.145             |
| SPI1        | NM_003120.1        | 1.22                    | 0.000318       | 0.172             |
| SLC1A2      | NM_004171.3        | -1.39                   | 0.000404       | 0.172             |
| MOG         | NM_001008228.2     | 2.26                    | 0.000419       | 0.172             |
| LMNA        | NM_005572.2        | 1.77                    | 0.000479       | 0.172             |
| CALB1       | NM_004929.2        | -2.04                   | 0.000628       | 0.172             |
| SERPINB6    | NM_004568.4        | 0.875                   | 0.000643       | 0.172             |
| OSMR        | NM_003999.2        | 1.66                    | 0.000664       | 0.172             |
| KLK6        | NM_001012964.2     | 2.58                    | 0.000719       | 0.172             |
| MSN         | NM_002444.2        | 0.866                   | 0.000729       | 0.172             |
| P2RX7       | NM_002562.5        | 1.39                    | 0.000735       | 0.172             |
| JAM3        | NM_032801.3        | 1.19                    | 0.000773       | 0.172             |
| HSPB1       | NM_001540.3        | 2.19                    | 0.00078        | 0.172             |
| ARHGEF10    | NM_014629.2        | 1.07                    | 0.000782       | 0.172             |
| MYRF        | NM_001127392.1     | 1.96                    | 0.000821       | 0.172             |
| INSR        | NM_000208.2        | 0.702                   | 0.000845       | 0.172             |
| DOT1L       | NM_032482.2        | 1.48                    | 0.000868       | 0.172             |
| CSF1        | NM_000757.4        | 1.37                    | 0.000937       | 0.176             |
| CD44        | NM_001001392.1     | 2.89                    | 0.000966       | 0.176             |
| ATF4        | NM_001675.2        | 1.05                    | 0.00105        | 0.183             |
| CD14        | NM_000591.2        | 2.12                    | 0.00112        | 0.188             |
| PFN1        | NM_005022.2        | 0.854                   | 0.00119        | 0.193             |
| CLN8        | NM_018941.3        | 1.07                    | 0.00127        | 0.198             |
| SMN1        | NM_000344.3        | 0.469                   | 0.00134        | 0.202             |
| NEO1        | NM_002499.2        | 0.733                   | 0.00145        | 0.213             |
| NPC1        | NM_000271.3        | 1.34                    | 0.00155        | 0.22              |
| CDKN1A      | NM_000389.2        | 2.04                    | 0.00183        | 0.239             |
| TLR2        | NM_003264.3        | 1.56                    | 0.00184        | 0.239             |
| XBP1        | NM_005080.2        | 1.04                    | 0.00186        | 0.239             |
| STAT1       | NM_139266.1        | 0.617                   | 0.00199        | 0.239             |
| NKX6        | NM_177400.2        | 1.8                     | 0.00206        | 0.239             |
| DNM2        | NM_004945.2        | 1.68                    | 0.00208        | 0.239             |
| SOX10       | NM_006941.3        | 1.5                     | 0.00209        | 0.239             |
| COMT        | NM_007310.2        | 1.18                    | 0.00211        | 0.239             |

|          |                |        |         |       |
|----------|----------------|--------|---------|-------|
| ATF6     | NM_007348.2    | 0.416  | 0.00216 | 0.239 |
| CAST     | NM_001042444.1 | 0.819  | 0.00223 | 0.242 |
| GBA      | NM_001005742.2 | -0.465 | 0.00234 | 0.247 |
| TF       | NM_001063.2    | 1.9    | 0.0024  | 0.247 |
| LAMP1    | NM_005561.3    | 0.706  | 0.00245 | 0.247 |
| PLEKHO2  | NM_025201.4    | 0.783  | 0.00266 | 0.259 |
| AKT1     | NM_001014432.1 | 0.658  | 0.00273 | 0.259 |
| EGFR     | NM_201282.1    | -0.526 | 0.00278 | 0.259 |
| BCAS1    | NM_003657.2    | 1.58   | 0.00279 | 0.259 |
| MBP      | NM_002385.2    | 1.94   | 0.00292 | 0.262 |
| DDIT3    | NM_004083.4    | 0.957  | 0.00294 | 0.262 |
| MAG      | NM_001199216.1 | 1.56   | 0.0031  | 0.271 |
| AIF1     | NM_032955.1    | 1.13   | 0.00317 | 0.272 |
| NFKBIA   | NM_020529.1    | 0.995  | 0.00326 | 0.275 |
| NGFR     | NM_002507.3    | 2.99   | 0.00341 | 0.282 |
| TNC      | NM_002160.3    | 2.38   | 0.00393 | 0.316 |
| LCLAT1   | NM_001002257.1 | -0.533 | 0.00409 | 0.316 |
| SOD2     | NM_000636.2    | 1.36   | 0.00414 | 0.316 |
| MAPKAPK2 | NM_004759.3    | 1.1    | 0.00416 | 0.316 |
| PSMB8    | NM_004159.4    | 0.649  | 0.00417 | 0.316 |
| SH3TC2   | NM_024577.3    | 1.35   | 0.00463 | 0.34  |
| BACE1    | NM_012104.3    | 0.823  | 0.00473 | 0.34  |
| TNFRSF1A | NM_001065.2    | 1.15   | 0.00476 | 0.34  |
| DLAT     | NM_001931.4    | -0.37  | 0.00484 | 0.34  |
| CERS2    | NM_022075.3    | 1.22   | 0.00494 | 0.34  |
| PHF21A   | NM_016621.3    | 0.7    | 0.00494 | 0.34  |
| IL13RA1  | NM_001560.2    | 0.898  | 0.00508 | 0.345 |
| SF3B2    | NM_006842.2    | 0.461  | 0.00549 | 0.363 |
| GAL3ST1  | NM_004861.1    | 1.44   | 0.00551 | 0.363 |
| GSN      | NM_000177.4    | 1.21   | 0.00599 | 0.386 |
| PPP2R5C  | NM_002719.3    | -0.56  | 0.00603 | 0.386 |
| TRIM28   | NM_005762.2    | 0.283  | 0.00643 | 0.406 |
| SIRT2    | NM_012237.3    | 0.918  | 0.00683 | 0.425 |
| PLXNB3   | NM_001163257.1 | 1.38   | 0.00724 | 0.445 |
| HMGB1    | NM_002128.4    | 0.541  | 0.00748 | 0.449 |
| CUL3     | NM_003590.2    | -0.438 | 0.0075  | 0.449 |
| PRKCA    | NM_002737.2    | 0.262  | 0.00766 | 0.452 |
| PMP22    | NM_000304.3    | 0.972  | 0.00777 | 0.453 |
| PLA2G16  | NM_007069.3    | 0.944  | 0.008   | 0.456 |
| CREB1    | NM_004379.3    | 0.525  | 0.00811 | 0.456 |
| NOVA1    | NM_006489.2    | 0.272  | 0.00828 | 0.456 |
| HSPA6    | NM_002155.3    | 3.31   | 0.00832 | 0.456 |

|         |                |        |         |       |
|---------|----------------|--------|---------|-------|
| SOX9    | NM_000346.2    | -0.47  | 0.00841 | 0.456 |
| FA2H    | NM_024306.4    | 1.36   | 0.00842 | 0.456 |
| GJB1    | NM_000166.5    | 1.54   | 0.00859 | 0.459 |
| BAX     | NM_138761.3    | 0.517  | 0.00884 | 0.46  |
| SGPL1   | NM_003901.3    | 0.63   | 0.00896 | 0.46  |
| TGFBR2  | NM_001024847.1 | 0.646  | 0.00901 | 0.46  |
| ACAA1   | NM_001130410.1 | 0.627  | 0.00909 | 0.46  |
| HTT     | NM_002111.7    | -0.618 | 0.0091  | 0.46  |
| JUN     | NM_002228.3    | 0.657  | 0.00922 | 0.461 |
| UGT8    | NM_003360.3    | 1.36   | 0.00939 | 0.464 |
| GNAI1   | NM_002069.4    | 1      | 0.00964 | 0.464 |
| GNAI2   | NM_002070.2    | 0.62   | 0.00971 | 0.464 |
| ATP6V1H | NM_213620.1    | -0.675 | 0.00985 | 0.464 |
| MECP2   | NM_001110792.1 | 0.242  | 0.00999 | 0.464 |
